# Supplementary material for: Genetic platelet depletion is superior in platelet transfusion compared to current models
Source: PubMed Central journal article supplement — Haematologica. 2019 Sep 19;105(6):1738–49. doi: 10.3324/haematol.2019.222448 (PMC7271594; doi:10.3324/haematol.2019.222448), 2020-06
Supplement: 2019_222448-Disclosures_and_Contributions.pdf [file 2019_222448-Disclosures_and_Contributions.pdf]

Haematologica  
HAEMATOL/2019/222448  
Version 3

Genetic platelet depletion is superior in platelet transfusion compared to current models

Manuel Salzmann, Waltraud C. Schrottmaier, Julia B. Kral-Pointner, Marion Mussbacher, Julia Volz, Bastian Hoesel, Bernhard Moser, Sonja Bleichert, Susanne Morava, Bernhard Nieswandt, Johannes A. Schmid, and Alice Assinger

Disclosures: none

Contributions: MS designed and carried out experiments, analyzed and interpreted data and wrote the manuscript. WCS, JBK and MM carried out experiments and contributed to the manuscript. JV, BH, BM, SB and SM carried out experiments. BN interpreted experiments and contributed to the manuscript. JAS and AA supervised all research, designed and interpreted experiments and contributed to the manuscript.
